# Supplementary material for: Do Not Forget About Smart Towns
Source: Springer Nature journal article supplement (doi:10.1007/s12599-018-0536-2), 2018-03-21
Supplement: MOESM1 [file 15555070]

# **Do Not Forget About Smart Towns – How to Bring Customized Digital Innovation to Rural Areas**

**Sabiölla Hosseini, Leonhard Frank, Gilbert Fridgen, Sebastian Heger**

Business & Information Systems Engineering (2018)

**Appendix (available online via <http://link.springer.com>)**

## Appendix A

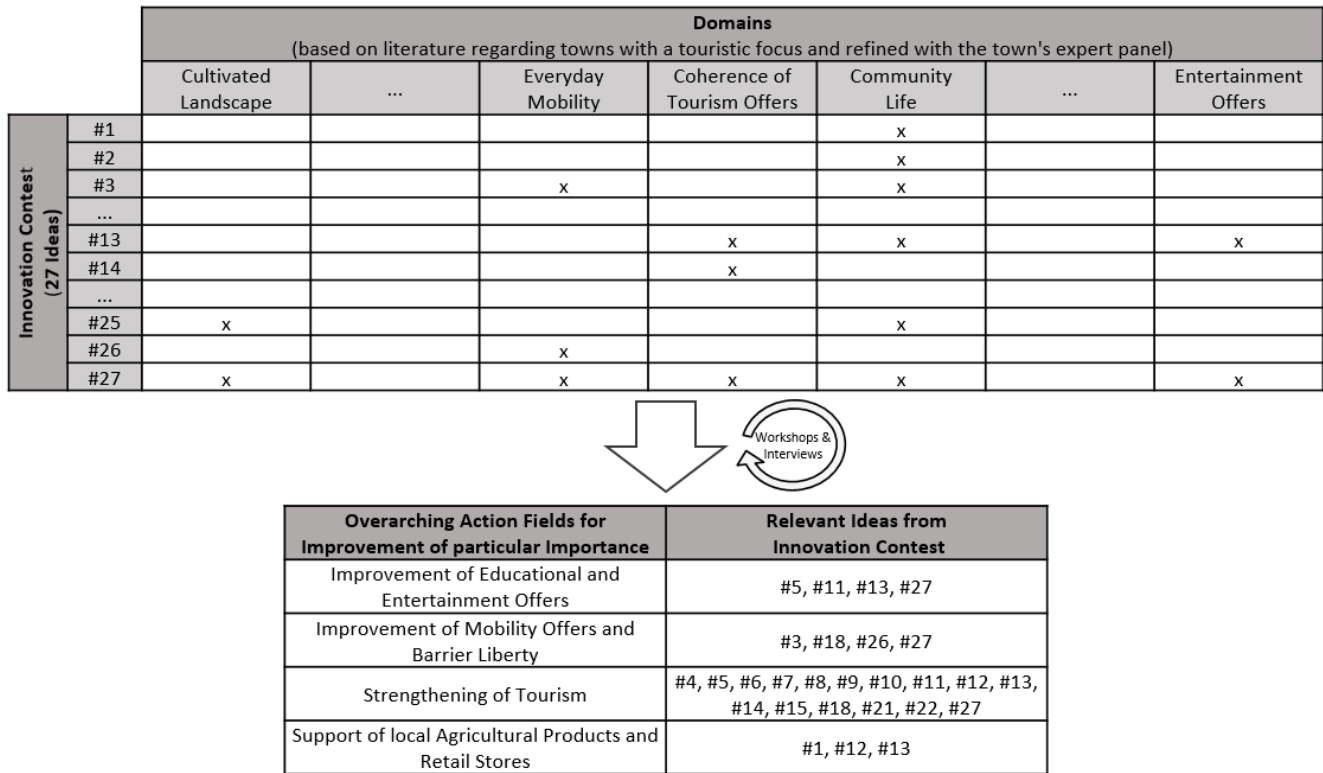

**Fig. A-1** Iterative approach to map ideas, problem domains, and identify relevant action fields (excerpt)
